# Supplementary material
Source: HighWire-hosted journal article supplement (https://bmjopen.bmj.com/content/10/9/e038621)
Supplement: inline-supplementary-material-1 [file inline-supplementary-material-1.pdf]

Database: All Ovid Medline <1946 - present>

Search Strategy:

- 
- 1 exp Colonoscopy/ (29622)
  - 2 exp Colonoscopes/ (1317)
  - 3 colonoscop\*.tw,kf. (29790)
  - 4 coloscop\*.tw,kf. (498)
  - 5 sigmoidoscop\*.tw,kf. (4657)
  - 6 proctosigmoidoscop\*.tw,kf. (307)
  - 7 ileocolonoscop\*.tw,kf. (588)
  - 8 (endoscop\* adj5 (colon\* or bowel\* or intestine\* or anus or anal or rectum or rectal\* or colorect\*)).tw,kf. (10688)
  - 9 1 or 2 or 3 or 4 or 5 or 6 or 7 or 8 (50974)
  - 10 exp Patient Satisfaction/ (88054)
  - 11 personal satisfaction/ (18287)
  - 12 Patient Comfort/ (407)
  - 13 Pain Management/ (32983)
  - 14 Pain Measurement/ (84697)
  - 15 Pain/ (132043)
  - 16 Pain, Procedural/ (364)
  - 17 Anxiety/ (78973)
  - 18 (satisf\* or preference\* or comfort\*).ti,kf. (70570)
  - 19 (patient\* adj2 (satisf\* or preference\* or comfort\*)).ab. (67438)
  - 20 (dissatisf\* or unsatisf\* or discomfort\* or uncomfortab\*).ti,kf. (5876)
  - 21 (patient\* adj2 (dissatisf\* or unsatisf\* or discomfort\* or uncomfortab\*)).ab. (7830)
  - 22 pain.tw,kf. (613386)
  - 23 (anxiet\* or anxious\* or nervous\*).tw,kf. (503071)
  - 24 willing\*.tw,kf. (40439)
  - 25 (patient\* adj2 experience\*).tw,kf. (94503)
  - 26 (patient adj2 perception\*).tw,kf. (5143)
  - 27 (patient adj2 (reported or perspective\* or complaint\* or feedback or evaluation\*)).tw,kf. (54863)
  - 28 10 or 11 or 12 or 13 or 14 or 15 or 16 or 17 or 18 or 19 or 20 or 21 or 22 or 23 or 24 or 25 or 26 or 27 (1467649)
  - 29 9 and 28 (6167)
  - 30 ((randomized controlled trial or controlled clinical trial).pt. or randomized.ab. or randomised.ab. or placebo.ab. or drug therapy.fs. or randomly.ab. or trial.ab. or groups.ab.) not

(exp animals/ not humans.sh.) (4059483)[**Modified Cochrane RCT filter:**

<https://libraryguides.mcgill.ca/epib629/rct-filters>]

31 29 and 30 (1950)

32 limit 31 to english language (1754)

\*\*\*\*\*
